# Supplementary material
Source: PubMed Central journal article supplement (PMC1201588)

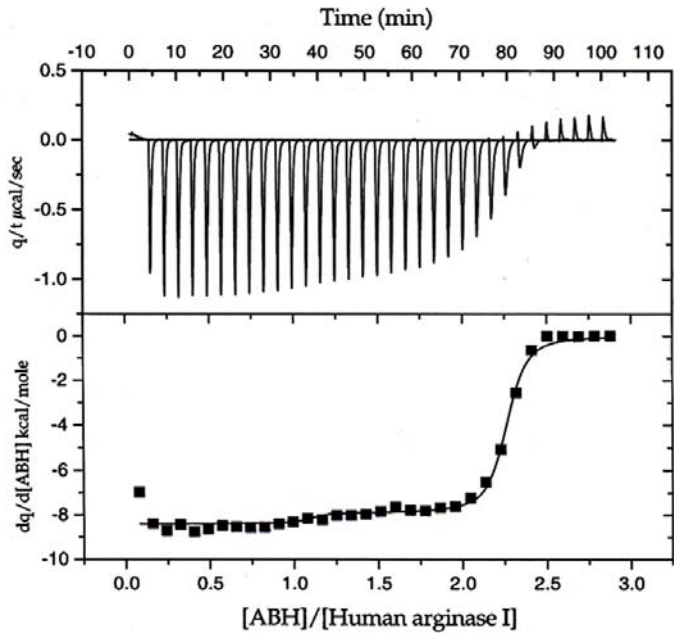

Supplement: pnas_0504027102_1.pdf [file pnas_0504027102_1.pdf]

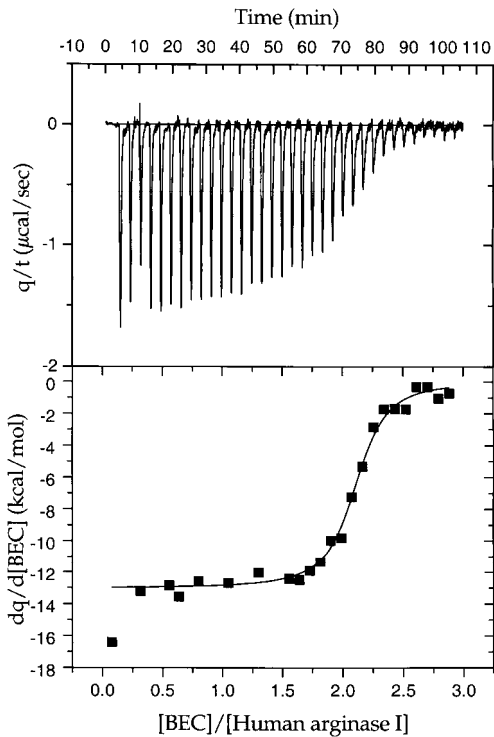

Supplement: pnas_0504027102_2.pdf [file pnas_0504027102_2.pdf]
